# Supplementary material for: Simple route for gram synthesis of less defective few layered graphene and its electrochemical performance
Source: Royal Society of Chemistry journal article supplement (doi:10.1039/c5ra06404j), 2015-01-01
Supplement: c5ra06404j1.pdf [file c5ra06404j1.pdf]

Electronic Supplementary Information

**Simple route for gram synthesis of less defective few layered  
graphene and its electrochemical performance<sup>†</sup>**

Nazish Parveen, Mohd Omaish Ansari and Moo Hwan Cho\*

School of Chemical Engineering, Yeungnam University, Gyeongsan-si, Gyeongbuk 712-749,  
South Korea

\*Email: mhcho@ynu.ac.kr

**Digital photographs of gram synthesis of FLGN**

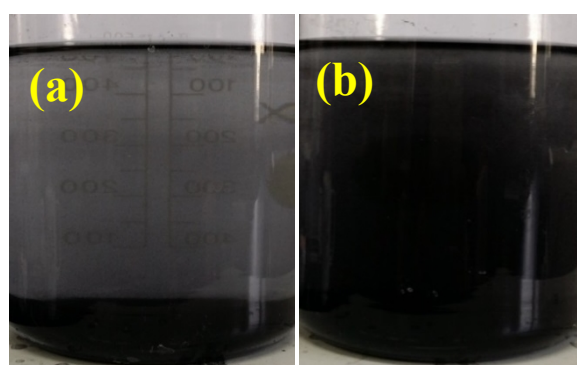

**Fig. S1** (a) Exfoliated FLGN suspension at the bottom of electrolyte solution and (b) Dispersed FLGN in electrolyte solution.

**$I_D/I_G$  and  $I_G/I_{2D}$  ratio bar graph of FLGN**

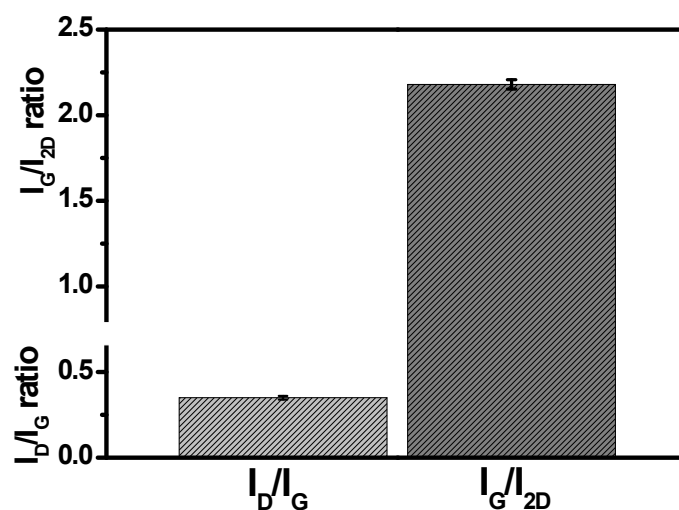

**Fig. S2**  $I_D/I_G$  and  $I_G/I_{2D}$  ratio bar graph of FLGN.

### AFM image of FLGN

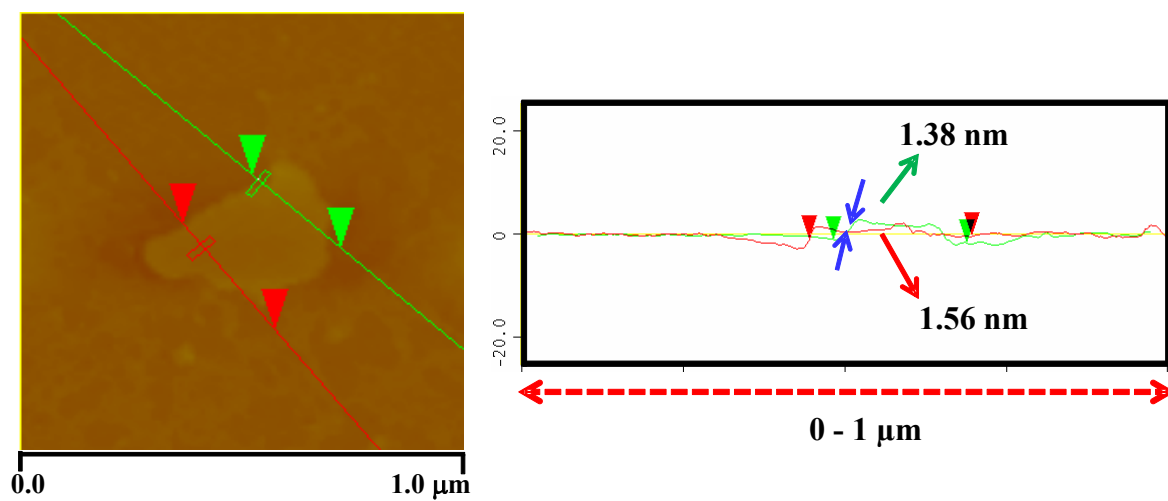

**Fig. S3** AFM image of FLGN.

### TEM image of FLGN

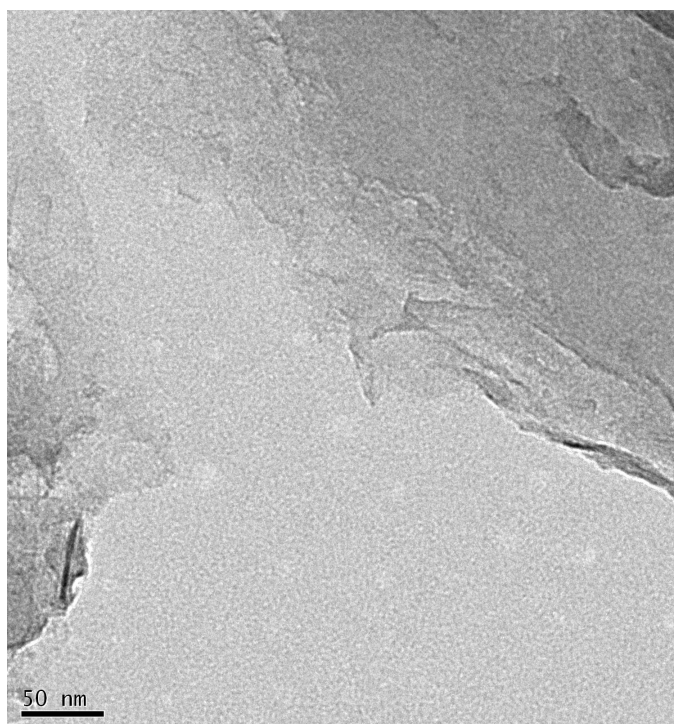

**Fig. S4** TEM image of FLGN.

## HRTEM images of FLGN

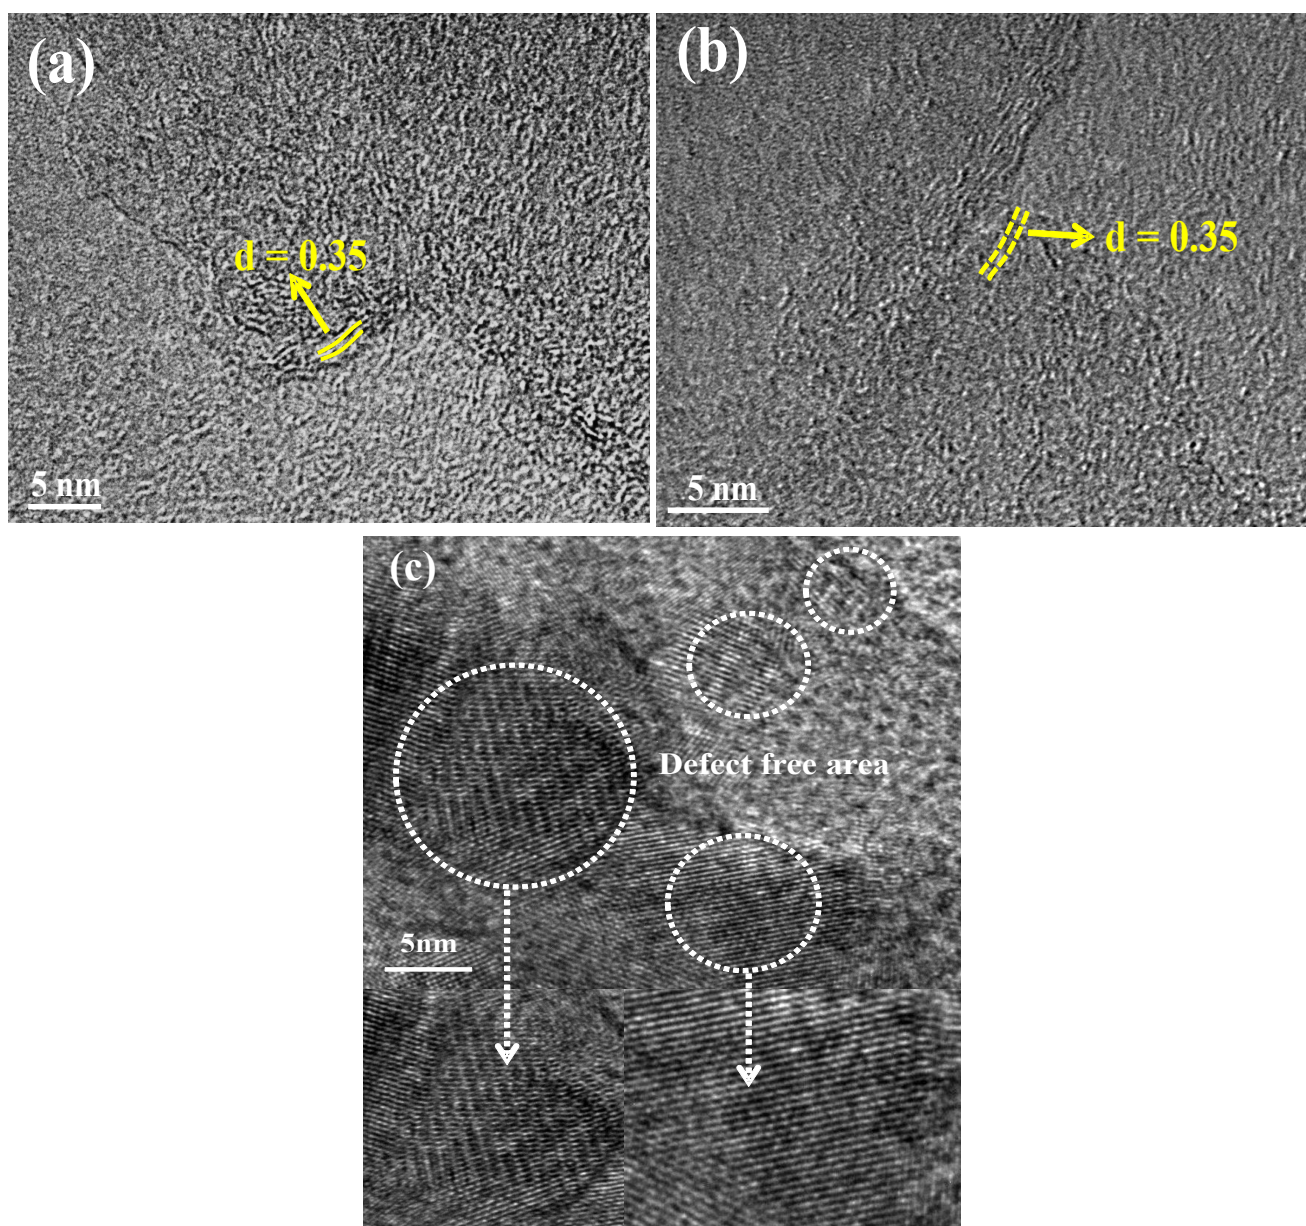

**Fig. S5** HRTEM images of FLGN (a, b and c).

### XPS survey spectra of FLGN

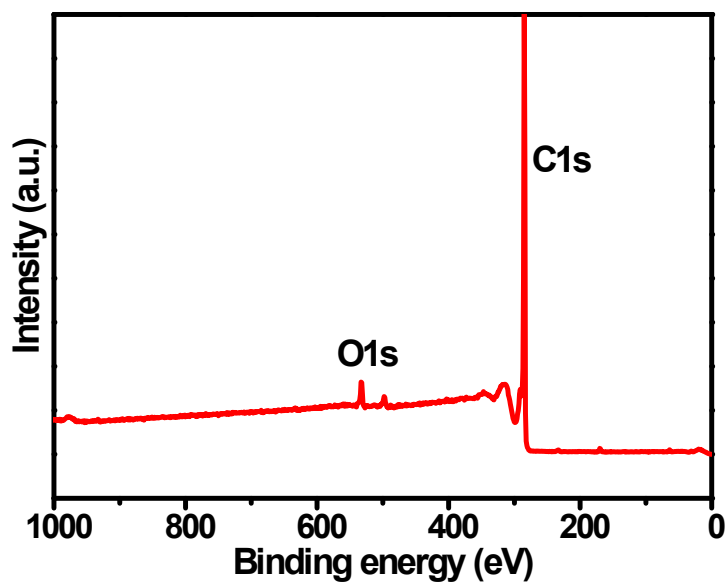

Fig. S6 XPS survey spectra of FLGN.

### XRD pattern of graphite sheet and FLGN

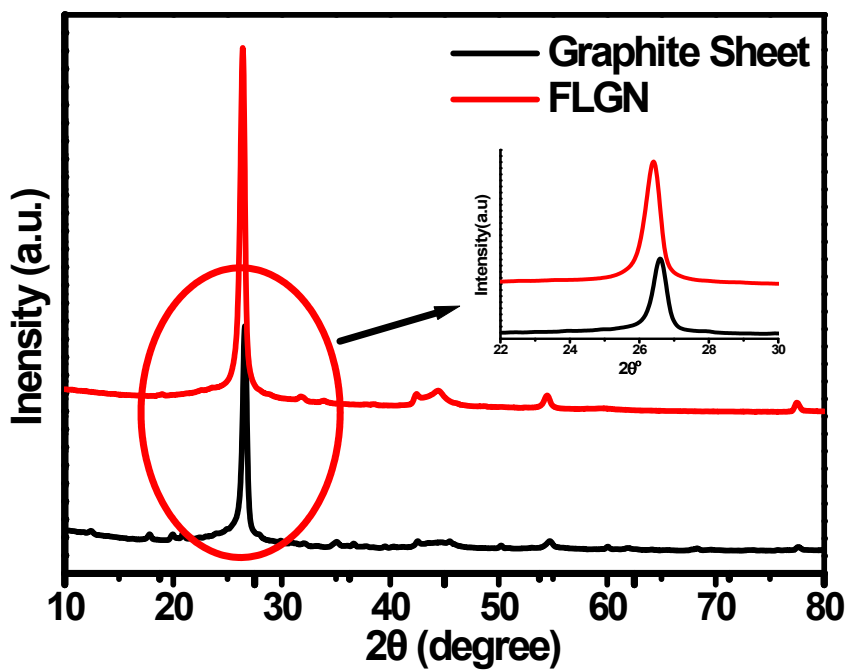

Fig. S7 XRD pattern of the FLGN.

**Table S1: Summary of the inorganic salt based electrolytes investigated in the electrochemical exfoliation of graphite sheet**

| <b>Electrolyte</b>                                                       | <b>Electrolyte concentration (M)</b> | <b>Voltage</b> | <b>Time</b> | <b>Results</b>                                               |
|--------------------------------------------------------------------------|--------------------------------------|----------------|-------------|--------------------------------------------------------------|
| <b>NaClO<sub>4</sub></b>                                                 | 0.1                                  | +10V           | 5 to 10 min | No exfoliation. (Intercalation of graphite electrode occurs) |
| <b>NaOH</b>                                                              | 0.1                                  | +10V           | 5 to 10 min | Poor exfoliation. (Product yield is very Low)                |
| <b>Na<sub>2</sub>S<sub>2</sub>O<sub>3</sub>+ NaOH+ NaClO<sub>4</sub></b> | 0.1                                  | +10V           | 3 to 5 min  | Efficient exfoliation. (As described in the text)            |
| <b>NaOH+ Na<sub>2</sub>S<sub>2</sub>O<sub>3</sub></b>                    | 0.1                                  | +10V           | 5 to 10 min | Poor exfoliation                                             |
| <b>Na<sub>2</sub>S<sub>2</sub>O<sub>3</sub>+ NaClO<sub>4</sub></b>       | 0.1                                  | +10V           | 5 to 10 min | Poor exfoliation                                             |

**Table S2: Comparison of the specific capacitances based on GN**

| <b>Product</b>                      | <b>Specific capacitance</b> | <b>Scan rate</b> | <b>Reference</b> |
|-------------------------------------|-----------------------------|------------------|------------------|
| <b>exfoliation of graphite (EG)</b> | 75 F/g                      | 10 mA/g          | 33               |
| <b>KOH modified GN</b>              | 136 F/g                     | 10 mA/g          | 34               |
| <b>Pillared Graphene-Paper (GP)</b> | 138 F/g                     | 10 mA/g          | 35               |
| <b>FLGN</b>                         | 147 F/g                     | 10 mA/g          | Present work     |
